# Supplementary material for: The Lipid Composition of Euglena gracilis Middle Plastid Membrane Resembles That of Primary Plastid Envelopes
Source: Oxford University Press journal article supplement (doi:10.1104/pp.20.00505), 2020-10-02
Supplement: plphys_v184_4_2052_s1.zip [file plphys_v184_4_2052_s1.zip]

Archive with 4 entries (4 files):
- PP2020-RA-00505R1_Supplemental_Figures_1_6.pdf
- PP2020-RA-00505R1_Supplemental_Table_1.xlsx
- PP2020-RA-00505R1_Supplemental_Table_2.xlsx
- PP2020-RA-00505R1_Supplemental_Table_3.xlsx
