# Supplementary material for: The Lipid Composition of Euglena gracilis Middle Plastid Membrane Resembles That of Primary Plastid Envelopes
Source: Oxford University Press journal article supplement (doi:10.1104/pp.20.00505), 2020-10-02
Supplement: plphys_v184_4_2052_s1.zip [file plphys_v184_4_2052_s1.zip › PP2020-RA-00505R1_Supplemental_Table_1.xlsx]

## Sheet: Table S1
Supplemental Table S1. The list of detected structural lipids in mixotrophic E. gracilis strain Z obtained by HPLC HR-MS/MS.
mark	C:DB	IDE	rt [min]	High-resolution
				experimental	calculated
DGDG_924	C34:7	18:3/16:4	7.82	924.567	924.568
DGDG_926	C34:6	18:3/16:3	8.54	956.583	926.584
DGDG_928	C34:5	18:3/16:2	9.65	928.599	928.599
DGDG_930_1	C34:4	18:2/16:2	10.74	930.614	930.615
DGDG_930_2	C34:4	18:1/18:3	10.87	930.614	930.615
DGDG_932_1	C34:3	18:2/16:1	11.88	932.63	932.63
DGDG_932_2	C34:3	18:3/16:0	12.1	932.63	932.63
DGDG_934	C34:2	18:1/16:1	13.08	934.646	934.646
DGDG_936	C34:1	18:1/16:0	14.28	936.661	936.662
MGDG_738	C32:5	16:3/16:2	9.06	738.514	738.515
MGDG_738	C32:5	16:4/16:1	9.6	738.513	738.515
MGDG_740	C32:4	16:6/16:1	10.26	740.53	740.531
MGDG_742_1	C32:3	14:0/18:3	11.5	742.546	742.546
MGDG_742_2	C32:3	16:0/16:3	11.79	742.547	742.546
MGDG_744_1	C32:2	16:1/16:1	12.48	744.562	744.562
MGDG_744_2	C32:2	16:0/16:2	12.8	744.562	744.562
MGDG_746_1	C32:1	ND	13.85	746.578	746.578
MGDG_746_2	C32:1	16:0/16:1	13.93	746.577	746.578
MGDG_748	C32:0	16:0/16:0	15.34	748.593	748.593
MGDG_752	C33:5	16:3/17:2	9.97	752.53	752.531
MGDG_760_1	C34:8	16:4/18:4	8	760.499	760.499
MGDG_760_2	C34:8	ND	8.2	760.5	760.499
MGDG_762	C34:7	18:3/16:4	9.08	762.515	762.515
MGDG_764	C34:6	18:3/16:3	9.74	764.531	764.531
MGDG_766	C34:5	18:3/16:2	10.8	766.546	766.546
MGDG_768	C34:4	18:3/16:1//18:2/16:2	11.86	768.562	768.562
MGDG_770_1	C34:3	18:2/16:1	13.03	770.578	770.578
MGDG_770_2	C34:3	18:3/16:0	13.32	770.577	770.578
MGDG_772	C34:2	18:1/16:1	14.22	772.593	772.593
MGDG_774	C34:1	18:1/16:0	15.57	774.609	774.609
MGDG_776	C34:0	18:0/16:0	14.21	776.624	776.625
MGDG_786	C36:9	20:5/16:4	8.84	786.515	786.515
MGDG_788_1	C36:8	20:5/16:3	9.53	788.53	788.531
MGDG_788_2	C36:8	20:4/16:4	9.75	788.529	788.531
MGDG_790	C36:7	20:3/16:4	10.81	790.546	790.546
MGDG_792	C36:6	20:5/16:1	11.73	792.562	792.562
MGDG_794	C36:5	20:4/16:1	12.71	794.578	794.578
SQDG_784	C30:0	16:0/14:0	7.76	784.523	784.524
SQDG_804_1	C32:4	16:3/16:1	5.16	804.492	804.493
SQDG_804_2	C32:4	16:4/16:0	5.34	804.495	804.493
SQDG_806	C32:3	16:1/16:2	5.73	806.508	806.508
SQDG_808	C32:2	16:0/16:2	7	808.523	808.524
SQDG_810	C32:1	16:0/16:1	8.27	810.538	810.54
SQDG_812	C32:0	16:0/16:0	9.79	812.555	812.555
SQDG_834	C34:3	18:3/16:0	7.72	834.539	834.54
SQDG_836	C34:2	18:2/16:0	8.9	836.555	836.555
SQDG_838	C34:1	18:1/16:0	10.08	838.57	838.571
SQDG_840	C34:0	18:0/16:0	11.49	840.585	840.587
PG_734_1	C32:3	16:0/16:3	3.62	734.496	734.497
PG_746	C33:4	ND	3.68	746.494	746.497
PG_748	C33:3	ND	4.84	748.512	748.512
PG_760	C34:4	16:1/18:3	7.72	760.512	760.512
PG_762	C34:3	16:0/18:3	9.08	762.515	762.528
PG_764	C34:2	16:0/18:2	10.02	764.536	764.544
PG_774	C35:4	ND	8.44	774.526	774.528
PG_790	C36:3	ND	8.96		790.559
PC_752	C34:5	14:0/20:5	11.23	752.522	752.522
PC_754_1	C34:4	14:0/20:4	12.03	754.538	754.538
PC_754_2	C34:4	ND	12.26	754.538	754.538
PC_756_1	C34:3	ND	13.11	756.553	756.554
PC_756_2	C34:3	ND	13.56	756.553	756.554
PC_758	C34:2	ND	14.23	758.569	758.569
PC_760	C34:1	ND	15.58	760.585	760.585
PC_784	C36:3	16:0/20:3	14.9	784.584	784.585
PC_786	C36:2	16:0/20:2	16.05	786.6	786.601
PC_810	C38:4	ND	15.49	810.6	810.601
PE-O_702	C34:2	O-16:0/18:2	12.46	702.543	702.543
PE-O_704	C34:1	O-16:0/18:1	13.67	704.559	704.559
PE_712	C34:4	ND	9.12	712.491	712.491
PE_714	C34:3	ND	10.04	714.506	714.507
PE_716	C34:2	ND	11.33	716.522	716.522
PE_718_1	C34:1	ND	12.58	718.538	718.538
PE_718_2	C34:1	ND	13.02	718.538	718.538
PE_740	C36:4	ND	13.07	740.522	740.522
PE_744	C36:2	ND	12.23	744.553	744.554
PE_818	C42:6	ND	12.76	818.569	818.569
PI_848	C34:4	ND	7.3	848.528	848.528
PI_876	C36:4	ND	9.22	876.559	876.56
The IDE of fatty acids is expressed in sn-1/sn-2; rt – retention time; C:DB – number of carbons: double bonds; experimental - values obtained by used methodology; calculated - values obtained in Thermo Xcalibur 3.0.63 based on chemical formula; ND - not determined. DGDG – digalactosyldiacylglycerol, MGDG – monogalactosyldiacylglycerol, SQDG – sulfoquinovosyldiacylglycerol, PG – phosphatidylglycer…
