# Supplementary material for: The Lipid Composition of Euglena gracilis Middle Plastid Membrane Resembles That of Primary Plastid Envelopes
Source: Oxford University Press journal article supplement (doi:10.1104/pp.20.00505), 2020-10-02
Supplement: plphys_v184_4_2052_s1.zip [file plphys_v184_4_2052_s1.zip › PP2020-RA-00505R1_Supplemental_Table_3.xlsx]

## Sheet: Table S3
Supplemental Table S3. The list of intact structural lipid species in E. gracilis strain Z plastid, thylakoid, envelope and mitochondrial fractions.
mark	C:DB	IDE	CP	Thyl	Env	Mit
				OFL	W10
DGDG_924	C34:7	18:3/16:4	+	+	-	t
DGDG_926	C34:6	18:3/16:3	++	++	++	+
DGDG_928	C34:5	18:3/16:2	++	++	+	t
DGDG_930_1	C34:4	18:2/16:2	++	++	+	t
DGDG_930_2	C34:4	18:1/18:3	+	+	+	-
DGDG_932_1	C34:3	18:2/16:1	+	+	+	-
DGDG_932_2	C34:3	18:3/16:0	++	++	+	-
DGDG_934	C34:2	18:1/16:1	+	+	+	-
DGDG_936	C34:1	18:1/16:0	+	+	+	-
MGDG_738	C32:5	16:3/16:2	+	+	-	t
MGDG_738	C32:5	16:4/16:1	+	+	+	+
MGDG_740	C32:4	16:6/16:1	++	++	+	+
MGDG_742_1	C32:3	14:0/18:3	++	++	+	+
MGDG_742_2	C32:3	16:0/16:3	+	+	-	t
MGDG_744_1	C32:2	16:1/16:1	+	+	-	t
MGDG_744_2	C32:2	16:0/16:2	+	+	-	t
MGDG_746_1	C32:1	ND	+	+	-	-
MGDG_746_2	C32:1	16:0/16:1	+	+	-	-
MGDG_748	C32:0	16:0/16:0	+	+	-	t
MGDG_752	C33:5	16:3/17:2	+	+	-	+
MGDG_760_1	C34:8	16:4/18:4	t	+	-	-
MGDG_760_2	C34:8	ND	t	+	-	-
MGDG_762	C34:7	18:3/16:4	+++	+++	+++	+
MGDG_764	C34:6	18:3/16:3	+++	+++	+++	+
MGDG_766	C34:5	18:3/16:2	++	+++	+++	+
MGDG_768	C34:4	18:3/16:1//18:2/16:2	++	++	++	+
MGDG_770_1	C34:3	18:2/16:1	++	++	+	t
MGDG_770_2	C34:3	18:3/16:0	++	+	+	-
MGDG_772	C34:2	18:1/16:1	++	++	++	+
MGDG_774	C34:1	18:1/16:0	++	++	+	-
MGDG_776	C34:0	18:0/16:0	+	+	-	-
MGDG_786	C36:9	20:5/16:4	t	t	-	+
MGDG_788_1	C36:8	20:5/16:3	t	+	+	+
MGDG_788_2	C36:8	20:4/16:4	+	+	+	+
MGDG_790	C36:7	20:3/16:4	+	+	+	++
MGDG_792	C36:6	20:5/16:1	+	+	+	++
MGDG_794	C36:5	20:4/16:1	+	+	-	++
SQDG_784	C30:0	16:0/14:0	+	+	+	t
SQDG_804_1	C32:4	16:3/16:1	t	t	+	-
SQDG_804_2	C32:4	16:4/16:0	t	t	-	-
SQDG_806	C32:3	16:1/16:2	t	t	+	-
SQDG_808	C32:2	16:0/16:2	t	t	-	-
SQDG_810	C32:1	16:0/16:1	+	+	+	-
SQDG_812	C32:0	16:0/16:0	+	+	+	-
SQDG_834	C34:3	18:3/16:0	++	++	++	t
SQDG_836	C34:2	18:2/16:0	+	+	+	-
SQDG_838	C34:1	18:1/16:0	++	++	++	t
SQDG_840	C34:0	18:0/16:0	+	+	-	-
PG_734_1	C32:3	16:0/16:3	+	+	t	+++
PG_746	C33:4	ND	-	t	-	-
PG_748	C33:3	ND	+	+	++	t
PG_760	C34:4	16:1/18:3	+	+	+	-
PG_762	C34:3	16:0/18:3	+	+	+	-
PG_764	C34:2	16:0/18:2	+	+	++	t
PG_774	C35:4	ND	-	t	+	-
PG_790	C36:3	ND	-	t	-	-
PC_752	C34:5	14:0/20:5	++	++	++	++
PC_754_1	C34:4	14:0/20:4	++	++	+++	+++
PC_754_2	C34:4	ND	-	+	+	+
PC_756_1	C34:3	ND	+	++	+	++
PC_756_2	C34:3	ND	+	+	+	+
PC_758	C34:2	ND	+	+	++	++
PC_760	C34:1	ND	+	+	+	++
PC_784	C36:3	16:0/20:3	++	++	+	++
PC_786	C36:2	16:0/20:2	+	+	++	++
PC_810	C38:4	ND	+	+	+	++
PE-O_702	C34:2	O-16:0/18:2	-	t	-	t
PE-O_704	C34:1	O-16:0/18:1	++	++	++	++
PE_712	C34:4	ND	+	+	+	++
PE_714	C34:3	ND	+	+	-	+
PE_716	C34:2	ND	+	+	t	+
PE_718_1	C34:1	ND	+	+	-	+
PE_718_2	C34:1	ND	-	-	-	-
PE_740	C36:4	ND	++	++	++	++
PE_744	C36:2	ND	+	+	+	+
PE_818	C42:6	ND	+	+	+	++
PI_848	C34:4	ND	+	+	-	t
PI_876	C36:4	ND	+	+	+	t
The IDE of fatty acids is expressed in sn-1/sn-2; C:DB – number of carbons: double bonds; CP – plastids; Thyl – thylakoids; Env – envelopes; Mit – mitochondria; - not detected; t trace < 0.001%; + <1%; ++ 1-10%; +++ >10%; ND - not determined. DGDG – digalactosyldiacylglycerol, MGDG – monogalactosyldiacylglycerol, SQDG – sulfoquinovosyldiacylglycerol, PG – phosphatidylglycerol, PC – phosphatidylch…
